# Supplementary material
Source: publisher figshare collection journal article supplement (https://acs.figshare.com/ndownloader/files/4292944)
Supplement: Supplementary file 1 [file 4292944]

data_General
_audit_creation_date                  '2008-11-19'
_audit_creation_method                'by CrystalStructure 3.6.0'
_audit_update_record                   ?

#==============================================================================

# PROCESSING SUMMARY (IUCr Office Use Only)

_journal_date_recd_electronic     ?
_journal_date_from_coeditor       ?
_journal_date_accepted            ?
_journal_coeditor_code            ?

#==============================================================================

# SUBMISSION DETAILS

_publ_contact_author_name             'Professor Masakatsu Matsumoto'
_publ_contact_author_email            'matsumo-chem@kanagawa-u.ac.jp'
_publ_contact_author_fax              '81(463)589684'
_publ_contact_author_phone            '81(463)594111'
_publ_contact_letter
;
    ENTER TEXT OF LETTER
;
_publ_requested_journal               'J. Am. Chem. Soc'
_publ_requested_category              'FA'
_publ_requested_coeditor_name          
;
Haruna Suzuki, Nobuko Watanabe, Hisako K. Ijuin, Jiro Tanaka and Chizuko Tanaka
;
#==============================================================================

# TITLE AND AUTHOR LIST

_publ_section_title
;
    ENTER SECTION TITLE
;
_publ_section_title_footnote
;
    ENTER FOOTNOTE TO TITLE OF PAPER
;
loop_
_publ_author_name
_publ_author_footnote
_publ_author_address
' Masakatsu Matsumoto '
;
  Department of Chemistry
  Kanagawa University
;
;
  Tsuchiya, Hiratsuka, Kanagawa 259-1293 Japan
;
_publ_section_synopsis
;
  ENTER SYNOPSIS
;

#==============================================================================

# TEXT

_publ_section_abstract
;
    ENTER ABSTRACT
;
_publ_section_comment
;
    ENTER TEXT
;
_publ_section_references
;
    ENTER OTHER REFERENCES

    Rigaku/MSC and Rigaku Corporation. (2004).
    CrystalStructure 3.6.0.
    Single Crystal Structure Analysis Software.
    Rigaku/MSC, 9009 New Trails Drive, The Woodlands, TX, USA 77381-5209.
    Rigaku, 3-9-12 Akishima, Tokyo 196-8666, Japan.

    Watkin, D.J., Prout, C.K. Carruthers, J.R. & Betteridge, P.W. (1996)
    CRYSTALS Issue 10, Chemical Crystallography Laboratory, Oxford, UK.

;
_publ_section_figure_captions
;
    ENTER FIGURE CAPTIONS
;
_publ_section_exptl_prep
;
    ENTER COMPOUND PREPARATION DETAILS
;
_publ_section_exptl_refinement
;
    ENTER SPECIAL DETAILS OF THE REFINEMENT
;

#==============================================================================

data___Anti-5b

#==============================================================================

# CHEMICAL DATA

_chemical_formula_sum                  'C26.50 H36.50 N O5 '
_chemical_formula_moiety               'C25 H33 N O5 0.25(C6H14)'
_chemical_formula_weight               449.08
_chemical_melting_point                ?

#==============================================================================

# CRYSTAL DATA
_symmetry_cell_setting                 triclinic
_symmetry_space_group_name_H-M        'P -1'
_symmetry_space_group_name_Hall       '-P 1'
_symmetry_Int_Tables_number            2
loop_
_symmetry_equiv_pos_site_id
_symmetry_equiv_pos_as_xyz
1   '+X,+Y,+Z'
2   '-X,-Y,-Z'

#------------------------------------------------------------------------------

_cell_length_a                         13.21(2)
_cell_length_b                         13.85(2)
_cell_length_c                         15.11(2)
_cell_angle_alpha                      96.80(3)
_cell_angle_beta                       91.23(3)
_cell_angle_gamma                      113.75(4)
_cell_volume                           2504.5(57)
_cell_formula_units_Z                  4
_cell_measurement_reflns_used          202
_cell_measurement_theta_min            3.1
_cell_measurement_theta_max            27.5
_cell_measurement_temperature          120.1

#------------------------------------------------------------------------------

_exptl_crystal_description            'prism'
_exptl_crystal_colour                 'colorless'
_exptl_crystal_size_max                0.20
_exptl_crystal_size_mid                0.15
_exptl_crystal_size_min                0.08
_exptl_crystal_density_diffrn          1.191
_exptl_crystal_density_meas            ?
_exptl_crystal_density_method         'not measured'
_exptl_crystal_F_000                   970.00
_exptl_absorpt_coefficient_mu          0.081
_exptl_absorpt_correction_type         multi-scan
_exptl_absorpt_process_details         
'Jacobson, R. (1998) Private communication'
_exptl_absorpt_correction_T_min        0.892
_exptl_absorpt_correction_T_max        0.994

#==============================================================================

# EXPERIMENTAL DATA

_diffrn_ambient_temperature            120.1
_diffrn_radiation_type                'Mo K\a'
_diffrn_radiation_wavelength           0.7107
_diffrn_measurement_device_type       'Rigaku Mercury'
_diffrn_measurement_method             \w
_diffrn_detector_area_resol_mean       7.31
_diffrn_reflns_number                  26554
_diffrn_reflns_av_R_equivalents        0.044
_diffrn_reflns_theta_max               27.48
_diffrn_measured_fraction_theta_max    0.9610
_diffrn_reflns_theta_full              27.48
_diffrn_measured_fraction_theta_full   0.9610
_diffrn_reflns_limit_h_min             -16
_diffrn_reflns_limit_h_max             16
_diffrn_reflns_limit_k_min             -17
_diffrn_reflns_limit_k_max             14
_diffrn_reflns_limit_l_min             -19
_diffrn_reflns_limit_l_max             19

#==============================================================================

# REFINEMENT DATA

_refine_special_details
;
    Refinement using all reflections. The weighted 
    R-factor (wR) and goodness of fit (S) are based on F^2^.
    R-factor (gt) are based on F. The threshold expression of
    F^2^ > 2.0 sigma(F^2^) is used only for calculating R-factor (gt).
;
_reflns_number_total                   11045
_reflns_number_gt                      4679
_reflns_threshold_expression           F^2^>2.0\s(F^2^)
_refine_ls_structure_factor_coef       Fsqd
_refine_ls_R_factor_gt                 0.0670
_refine_ls_wR_factor_ref               0.1880
_refine_ls_hydrogen_treatment          refall
_refine_ls_number_reflns               11045
_refine_ls_number_parameters           659
_refine_ls_goodness_of_fit_ref         1.000
_refine_ls_weighting_scheme            calc
_refine_ls_weighting_details
'w = 1/[0.0005Fo^2^ + 1.0000\s(Fo^2^)]/(4Fo^2^)'
_refine_ls_shift/su_max                0.0000
_refine_diff_density_max               0.45
_refine_diff_density_min               -0.37
_refine_ls_extinction_method           none
_refine_ls_extinction_coef             ?

loop_
_atom_type_symbol
_atom_type_description
_atom_type_scat_dispersion_real
_atom_type_scat_dispersion_imag
_atom_type_scat_source
  'C' 'C'  0.003 0.002 
;
International Tables for Crystallography
(1992, Vol. C, Tables 4.2.6.8 and 6.1.1.4)
;
  'H' 'H'  0.000 0.000 
;
International Tables for Crystallography
(1992, Vol. C, Table 6.1.1.4)
;
  'N' 'N'  0.006 0.003 
;
International Tables for Crystallography
(1992, Vol. C, Tables 4.2.6.8 and 6.1.1.4)
;
  'O' 'O'  0.011 0.006 
;
International Tables for Crystallography
(1992, Vol. C, Tables 4.2.6.8 and 6.1.1.4)
;

#==============================================================================

# ATOMIC COORDINATES AND THERMAL PARAMETERS

loop_
_atom_site_label
_atom_site_type_symbol
_atom_site_fract_x
_atom_site_fract_y
_atom_site_fract_z
_atom_site_U_iso_or_equiv
_atom_site_adp_type
_atom_site_occupancy
_atom_site_symmetry_multiplicity
_atom_site_calc_flag
_atom_site_refinement_flags
_atom_site_disorder_assembly
_atom_site_disorder_group
 O(1)   O  0.8941(2)   0.6164(2)   0.3088(2)   0.0290(6)   Uani 1.00 1 d . . .
 O(2)   O  0.9050(2)   0.5668(2)   0.3899(2)   0.0298(6)   Uani 1.00 1 d . . .
 O(3)   O  0.5858(2)   0.6281(2)   0.3155(2)   0.0293(6)   Uani 1.00 1 d . . .
 O(4)   O  0.7031(2)   0.6427(2)   0.2057(2)   0.0326(7)   Uani 1.00 1 d . . .
 O(5)   O  0.5641(2)   0.2607(2)   0.0338(2)   0.0311(6)   Uani 1.00 1 d . . .
 O(6)   O  0.1834(2)   -0.0414(2)  0.2171(2)   0.0320(7)   Uani 1.00 1 d . . .
 O(7)   O  0.2309(2)   -0.1211(2)  0.1900(2)   0.0334(7)   Uani 1.00 1 d . . .
 O(8)   O  0.4289(2)   0.2463(2)   0.1687(2)   0.0367(7)   Uani 1.00 1 d . . .
 O(9)   O  0.2800(2)   0.2103(2)   0.2504(2)   0.0319(7)   Uani 1.00 1 d . . .
 O(10)  O  0.4346(2)   0.2217(2)   0.5649(2)   0.0338(7)   Uani 1.00 1 d . . .
 N(1)   N  0.6965(2)   0.5388(2)   0.3091(2)   0.0240(7)   Uani 1.00 1 d . . .
 N(2)   N  0.3656(2)   0.0991(2)   0.2371(2)   0.0267(7)   Uani 1.00 1 d . . .
 C(1)   C  0.7928(2)   0.5238(2)   0.2768(2)   0.0237(8)   Uani 1.00 1 d . . .
 C(2)   C  0.8199(2)   0.4622(3)   0.3479(2)   0.0249(8)   Uani 1.00 1 d . . .
 C(3)   C  0.7247(3)   0.4319(3)   0.4115(2)   0.0270(9)   Uani 1.00 1 d . . .
 C(4)   C  0.6807(3)   0.5180(3)   0.4022(2)   0.0278(9)   Uani 1.00 1 d . . .
 C(5)   C  0.7636(3)   0.4447(3)   0.5102(2)   0.0369(11)  Uani 1.00 1 d . . .
 C(6)   C  0.6307(3)   0.3219(3)   0.3847(2)   0.0340(10)  Uani 1.00 1 d . . .
 C(7)   C  0.8799(3)   0.3880(3)   0.3208(2)   0.0294(9)   Uani 1.00 1 d . . .
 C(8)   C  0.9854(3)   0.4498(3)   0.2746(3)   0.0408(11)  Uani 1.00 1 d . . .
 C(9)   C  0.9173(3)   0.3542(3)   0.4045(2)   0.0366(11)  Uani 1.00 1 d . . .
 C(10)  C  0.8109(3)   0.2862(3)   0.2560(3)   0.0403(11)  Uani 1.00 1 d . . .
 C(11)  C  0.6568(3)   0.6065(3)   0.2783(2)   0.0266(9)   Uani 1.00 1 d . . .
 C(12)  C  0.6575(3)   0.7001(3)   0.1515(2)   0.0360(11)  Uani 1.00 1 d . . .
 C(13)  C  0.7259(5)   0.7128(4)   0.0715(3)   0.077(2)    Uani 1.00 1 d . . .
 C(14)  C  0.6795(4)   0.8083(3)   0.2021(3)   0.0496(13)  Uani 1.00 1 d . . .
 C(15)  C  0.5354(4)   0.6331(4)   0.1256(3)   0.061(2)    Uani 1.00 1 d . . .
 C(16)  C  0.7787(2)   0.4883(2)   0.1762(2)   0.0221(8)   Uani 1.00 1 d . . .
 C(17)  C  0.6827(2)   0.3996(3)   0.1480(2)   0.0237(8)   Uani 1.00 1 d . . .
 C(18)  C  0.6582(3)   0.3516(3)   0.0588(2)   0.0251(8)   Uani 1.00 1 d . . .
 C(19)  C  0.7297(2)   0.3953(3)   -0.0038(2)  0.0257(9)   Uani 1.00 1 d . . .
 C(20)  C  0.8261(3)   0.4895(3)   0.0207(2)   0.0245(9)   Uani 1.00 1 d . . .
 C(21)  C  0.8965(3)   0.5366(3)   -0.0453(2)  0.0287(9)   Uani 1.00 1 d . . .
 C(22)  C  0.9883(3)   0.6301(3)   -0.0243(2)  0.0330(10)  Uani 1.00 1 d . . .
 C(23)  C  1.0140(3)   0.6795(3)   0.0644(2)   0.0332(10)  Uani 1.00 1 d . . .
 C(24)  C  0.9489(3)   0.6353(3)   0.1304(2)   0.0300(9)   Uani 1.00 1 d . . .
 C(25)  C  0.8527(2)   0.5380(2)   0.1118(2)   0.0230(8)   Uani 1.00 1 d . . .
 C(26)  C  0.2798(3)   0.0196(3)   0.2796(2)   0.0265(9)   Uani 1.00 1 d . . .
 C(27)  C  0.3127(3)   -0.0785(3)  0.2686(2)   0.0279(9)   Uani 1.00 1 d . . .
 C(28)  C  0.4282(3)   -0.0409(3)  0.2296(2)   0.0308(9)   Uani 1.00 1 d . . .
 C(29)  C  0.4318(3)   0.0534(3)   0.1839(2)   0.0338(10)  Uani 1.00 1 d . . .
 C(30)  C  0.4381(3)   -0.1236(3)  0.1565(3)   0.0409(11)  Uani 1.00 1 d . . .
 C(31)  C  0.5264(3)   -0.0049(3)  0.3000(3)   0.0375(11)  Uani 1.00 1 d . . .
 C(32)  C  0.2761(3)   -0.1611(3)  0.3353(2)   0.0313(9)   Uani 1.00 1 d . . .
 C(33)  C  0.3416(3)   -0.1241(3)  0.4267(3)   0.0400(11)  Uani 1.00 1 d . . .
 C(34)  C  0.1533(3)   -0.1904(3)  0.3523(3)   0.0403(11)  Uani 1.00 1 d . . .
 C(35)  C  0.2847(4)   -0.2640(3)  0.2935(3)   0.0490(13)  Uani 1.00 1 d . . .
 C(36)  C  0.3618(3)   0.1901(3)   0.2155(2)   0.0267(9)   Uani 1.00 1 d . . .
 C(37)  C  0.2787(3)   0.3169(3)   0.2545(2)   0.0293(9)   Uani 1.00 1 d . . .
 C(38)  C  0.1786(3)   0.3063(3)   0.3039(3)   0.0479(13)  Uani 1.00 1 d . . .
 C(39)  C  0.3823(3)   0.3951(3)   0.3104(3)   0.060(1)    Uani 1.00 1 d . . .
 C(40)  C  0.2706(4)   0.3457(4)   0.1633(3)   0.070(2)    Uani 1.00 1 d . . .
 C(41)  C  0.2547(3)   0.0687(2)   0.3673(2)   0.0251(8)   Uani 1.00 1 d . . .
 C(42)  C  0.3444(3)   0.1201(3)   0.4279(2)   0.0266(9)   Uani 1.00 1 d . . .
 C(43)  C  0.3380(3)   0.1743(3)   0.5110(2)   0.0262(9)   Uani 1.00 1 d . . .
 C(44)  C  0.2400(3)   0.1780(3)   0.5322(2)   0.0265(9)   Uani 1.00 1 d . . .
 C(45)  C  0.1461(2)   0.1297(2)   0.4707(2)   0.0255(9)   Uani 1.00 1 d . . .
 C(46)  C  0.0456(3)   0.1396(3)   0.4915(2)   0.0315(10)  Uani 1.00 1 d . . .
 C(47)  C  -0.0454(3)  0.0972(3)   0.4320(3)   0.0337(10)  Uani 1.00 1 d . . .
 C(48)  C  -0.0410(3)  0.0418(3)   0.3498(3)   0.0351(10)  Uani 1.00 1 d . . .
 C(49)  C  0.0536(3)   0.0294(3)   0.3274(2)   0.0314(9)   Uani 1.00 1 d . . .
 C(50)  C  0.1502(3)   0.0722(3)   0.3865(2)   0.0253(8)   Uani 1.00 1 d . . .
 C(51)  C  0.9451(5)   1.0003(5)   -0.0112(4)  0.111(3)    Uani 1.00 1 d . . .
 C(52)  C  0.8983(6)   1.0480(6)   0.0652(5)   0.115(3)    Uani 1.00 1 d . . .
 C(53)  C  0.7845(6)   1.0467(6)   0.0433(5)   0.139(3)    Uani 1.00 1 d . . .
 H(1)   H  0.6044      0.4923      0.4129      0.034       Uiso 1.00 1 c R . .
 H(2)   H  0.7213      0.5808      0.4427      0.034       Uiso 1.00 1 c R . .
 H(3)   H  0.7782      0.5147      0.5381      0.047       Uiso 1.00 1 c R . .
 H(4)   H  0.7072      0.3945      0.5394      0.047       Uiso 1.00 1 c R . .
 H(5)   H  0.8294      0.4327      0.5140      0.047       Uiso 1.00 1 c R . .
 H(6)   H  0.6467      0.2704      0.4114      0.040       Uiso 1.00 1 c R . .
 H(7)   H  0.5636      0.3233      0.4050      0.040       Uiso 1.00 1 c R . .
 H(8)   H  0.6242      0.3047      0.3215      0.040       Uiso 1.00 1 c R . .
 H(9)   H  1.0457      0.4834      0.3188      0.055       Uiso 1.00 1 c R . .
 H(10)  H  1.0005      0.4021      0.2319      0.055       Uiso 1.00 1 c R . .
 H(11)  H  0.9741      0.5024      0.2457      0.055       Uiso 1.00 1 c R . .
 H(12)  H  0.8602      0.2904      0.4179      0.047       Uiso 1.00 1 c R . .
 H(13)  H  0.9825      0.3427      0.3947      0.047       Uiso 1.00 1 c R . .
 H(14)  H  0.9319      0.4093      0.4532      0.047       Uiso 1.00 1 c R . .
 H(15)  H  0.8215      0.3003      0.1961      0.052       Uiso 1.00 1 c R . .
 H(16)  H  0.8337      0.2311      0.2656      0.051       Uiso 1.00 1 c R . .
 H(17)  H  0.7348      0.2650      0.2665      0.051       Uiso 1.00 1 c R . .
 H(18)  H  0.6916      0.6533      0.0264      0.117       Uiso 1.00 1 c R . .
 H(19)  H  0.7328      0.7758      0.0482      0.117       Uiso 1.00 1 c R . .
 H(20)  H  0.7970      0.7176      0.0904      0.117       Uiso 1.00 1 c R . .
 H(21)  H  0.7492      0.8594      0.1892      0.065       Uiso 1.00 1 c R . .
 H(22)  H  0.6228      0.8295      0.1849      0.065       Uiso 1.00 1 c R . .
 H(23)  H  0.6800      0.8034      0.2643      0.065       Uiso 1.00 1 c R . .
 H(24)  H  0.4930      0.6500      0.1699      0.073       Uiso 1.00 1 c R . .
 H(25)  H  0.5158      0.6480      0.0695      0.072       Uiso 1.00 1 c R . .
 H(26)  H  0.5209      0.5596      0.1214      0.072       Uiso 1.00 1 c R . .
 H(27)  H  0.6318      0.3695      0.1909      0.029       Uiso 1.00 1 c R . .
 H(28)  H  0.7149      0.3622      -0.0642     0.032       Uiso 1.00 1 c R . .
 H(29)  H  0.8792      0.5039      -0.1058     0.036       Uiso 1.00 1 c R . .
 H(30)  H  1.0355      0.6606      -0.0692     0.041       Uiso 1.00 1 c R . .
 H(31)  H  1.0773      0.7449      0.0787      0.038       Uiso 1.00 1 c R . .
 H(32)  H  0.9680      0.6706      0.1901      0.035       Uiso 1.00 1 c R . .
 H(33)  H  0.5062      0.1044      0.1846      0.042       Uiso 1.00 1 c R . .
 H(34)  H  0.4007      0.0300      0.1239      0.042       Uiso 1.00 1 c R . .
 H(35)  H  0.4154      -0.1126     0.0998      0.051       Uiso 1.00 1 c R . .
 H(36)  H  0.5130      -0.1154     0.1568      0.051       Uiso 1.00 1 c R . .
 H(37)  H  0.3915      -0.1930     0.1681      0.052       Uiso 1.00 1 c R . .
 H(38)  H  0.5423      -0.0642     0.3093      0.046       Uiso 1.00 1 c R . .
 H(39)  H  0.5896      0.0484      0.2797      0.046       Uiso 1.00 1 c R . .
 H(40)  H  0.5076      0.0232      0.3545      0.046       Uiso 1.00 1 c R . .
 H(41)  H  0.3078      -0.0895     0.4663      0.050       Uiso 1.00 1 c R . .
 H(42)  H  0.3425      -0.1841     0.4508      0.050       Uiso 1.00 1 c R . .
 H(43)  H  0.4155      -0.0760     0.4201      0.050       Uiso 1.00 1 c R . .
 H(44)  H  0.1081      -0.2500     0.3104      0.046       Uiso 1.00 1 c R . .
 H(45)  H  0.1410      -0.2082     0.4112      0.046       Uiso 1.00 1 c R . .
 H(46)  H  0.1348      -0.1319     0.3458      0.046       Uiso 1.00 1 c R . .
 H(47)  H  0.3564      -0.2606     0.3083      0.059       Uiso 1.00 1 c R . .
 H(48)  H  0.2304      -0.3234     0.3156      0.059       Uiso 1.00 1 c R . .
 H(49)  H  0.2723      -0.2719     0.2303      0.059       Uiso 1.00 1 c R . .
 H(50)  H  0.1997      0.3255      0.3662      0.063       Uiso 1.00 1 c R . .
 H(51)  H  0.1478      0.3521      0.2844      0.063       Uiso 1.00 1 c R . .
 H(52)  H  0.1258      0.2344      0.2927      0.063       Uiso 1.00 1 c R . .
 H(53)  H  0.1944      0.3224      0.1446      0.099       Uiso 1.00 1 c R . .
 H(54)  H  0.3070      0.4207      0.1645      0.099       Uiso 1.00 1 c R . .
 H(55)  H  0.3041      0.3123      0.1223      0.099       Uiso 1.00 1 c R . .
 H(56)  H  0.4135      0.1189      0.4132      0.032       Uiso 1.00 1 c R . .
 H(57)  H  0.2344      0.2124      0.5890      0.033       Uiso 1.00 1 c R . .
 H(58)  H  0.0424      0.1761      0.5480      0.039       Uiso 1.00 1 c R . .
 H(59)  H  -0.1112     0.1056      0.4471      0.041       Uiso 1.00 1 c R . .
 H(60)  H  -0.1048     0.0124      0.3088      0.041       Uiso 1.00 1 c R . .
 H(61)  H  0.0542      -0.0086     0.2709      0.037       Uiso 1.00 1 c R . .
 H(62)  H  0.5186      0.2416      0.0902      0.034       Uiso 1.00 1 c R . .
 H(63)  H  0.4233      0.2691      0.6227      0.041       Uiso 1.00 1 c R . .
 H(64)  H  0.4423      0.4219      0.2739      0.070       Uiso 1.00 1 c R . .
 H(65)  H  0.3677      0.4526      0.3389      0.070       Uiso 1.00 1 c R . .
 H(66)  H  0.4009      0.3595      0.3539      0.070       Uiso 1.00 1 c R . .
 H(67)  H  0.9507      1.0412      -0.0586     0.116       Uiso 1.00 1 c R . .
 H(68)  H  0.8928      0.9292      -0.0294     0.115       Uiso 1.00 1 c R . .
 H(69)  H  0.7279      0.9816      0.0550      0.150       Uiso 1.00 1 c R . .
 H(70)  H  0.9481      1.1199      0.0840      0.121       Uiso 1.00 1 c R . .
 H(71)  H  0.8908      1.0080      0.1135      0.121       Uiso 1.00 1 c R . .
 H(72)  H  0.7758      1.1048      0.0773      0.150       Uiso 1.00 1 c R . .
 H(73)  H  0.7794      1.0523      -0.0185     0.150       Uiso 1.00 1 c R . .


loop_
_atom_site_aniso_label
_atom_site_aniso_U_11
_atom_site_aniso_U_22
_atom_site_aniso_U_33
_atom_site_aniso_U_12
_atom_site_aniso_U_13
_atom_site_aniso_U_23
 O(1)   0.0321(12)  0.0278(13)  0.0196(12)  0.0046(10)  -0.0036(10) 0.0040(10) 
 O(2)   0.0332(12)  0.0297(13)  0.0211(13)  0.0067(10)  -0.0014(10) 0.0056(10) 
 O(3)   0.0334(12)  0.0265(12)  0.030(1)    0.0156(10)  0.0045(10)  -0.0017(10)
 O(4)   0.047(1)    0.039(1)    0.0251(13)  0.0283(12)  0.0092(11)  0.0129(11) 
 O(5)   0.0280(12)  0.0322(13)  0.0236(13)  0.0047(10)  0.0034(10)  -0.0043(10)
 O(6)   0.0317(12)  0.035(1)    0.029(1)    0.0155(11)  0.0008(10)  -0.0061(11)
 O(7)   0.0380(13)  0.0297(13)  0.031(1)    0.0153(11)  0.0006(11)  -0.0067(11)
 O(8)   0.041(1)    0.033(1)    0.039(2)    0.0151(11)  0.0198(12)  0.0106(12) 
 O(9)   0.0315(12)  0.0294(13)  0.041(2)    0.0168(11)  0.0135(11)  0.0089(11) 
 O(10)  0.0314(12)  0.041(1)    0.029(1)    0.0190(11)  -0.0031(10) -0.0099(11)
 N(1)   0.030(1)    0.029(2)    0.018(1)    0.0170(12)  0.0043(11)  0.0037(11) 
 N(2)   0.030(1)    0.025(1)    0.027(2)    0.0128(12)  0.0120(12)  0.0033(12) 
 C(1)   0.021(2)    0.021(2)    0.025(2)    0.0059(13)  0.0002(13)  -0.0012(13)
 C(2)   0.024(2)    0.024(2)    0.022(2)    0.0060(13)  -0.0036(13) -0.0005(13)
 C(3)   0.033(2)    0.028(2)    0.018(2)    0.011(1)    -0.001(1)   0.002(1)   
 C(4)   0.034(2)    0.032(2)    0.019(2)    0.016(2)    0.004(1)    0.003(1)   
 C(5)   0.043(2)    0.047(2)    0.025(2)    0.022(2)    0.004(2)    0.009(2)   
 C(6)   0.037(2)    0.028(2)    0.034(2)    0.011(2)    0.008(2)    0.005(2)   
 C(7)   0.031(2)    0.040(2)    0.024(2)    0.020(2)    0.002(1)    0.007(2)   
 C(8)   0.038(2)    0.061(3)    0.037(2)    0.031(2)    0.009(2)    0.016(2)   
 C(9)   0.040(2)    0.043(2)    0.033(2)    0.022(2)    0.006(2)    0.014(2)   
 C(10)  0.047(2)    0.039(2)    0.042(2)    0.027(2)    0.005(2)    -0.002(2)  
 C(11)  0.029(2)    0.025(2)    0.023(2)    0.009(1)    -0.001(1)   -0.001(1)  
 C(12)  0.051(2)    0.043(2)    0.029(2)    0.033(2)    0.006(2)    0.011(2)   
 C(13)  0.141(5)    0.110(4)    0.042(3)    0.105(4)    0.044(3)    0.045(3)   
 C(14)  0.074(3)    0.042(2)    0.046(3)    0.035(2)    0.010(2)    0.013(2)   
 C(15)  0.068(3)    0.059(3)    0.053(3)    0.025(2)    -0.026(2)   0.007(2)   
 C(16)  0.024(2)    0.027(2)    0.020(2)    0.0146(13)  0.0033(13)  0.0030(13) 
 C(17)  0.023(2)    0.028(2)    0.021(2)    0.012(1)    0.0056(13)  0.0039(13) 
 C(18)  0.024(2)    0.026(2)    0.026(2)    0.012(1)    0.0015(13)  -0.000(1)  
 C(19)  0.030(2)    0.031(2)    0.018(2)    0.016(1)    0.0004(13)  -0.002(1)  
 C(20)  0.025(2)    0.031(2)    0.023(2)    0.017(1)    0.0034(13)  0.005(1)   
 C(21)  0.029(2)    0.036(2)    0.024(2)    0.016(2)    0.005(1)    0.005(2)   
 C(22)  0.030(2)    0.040(2)    0.031(2)    0.014(2)    0.010(2)    0.013(2)   
 C(23)  0.028(2)    0.032(2)    0.034(2)    0.006(2)    0.004(2)    0.008(2)   
 C(24)  0.032(2)    0.031(2)    0.024(2)    0.010(2)    0.001(1)    0.002(2)   
 C(25)  0.025(2)    0.026(2)    0.022(2)    0.0142(13)  0.0019(13)  0.0022(13) 
 C(26)  0.024(2)    0.028(2)    0.023(2)    0.007(1)    0.0008(13)  -0.001(1)  
 C(27)  0.028(2)    0.024(2)    0.029(2)    0.009(1)    0.004(1)    -0.004(1)  
 C(28)  0.035(2)    0.028(2)    0.030(2)    0.015(2)    0.010(2)    -0.001(2)  
 C(29)  0.040(2)    0.033(2)    0.034(2)    0.019(2)    0.016(2)    0.003(2)   
 C(30)  0.051(2)    0.033(2)    0.043(2)    0.022(2)    0.019(2)    0.001(2)   
 C(31)  0.034(2)    0.036(2)    0.045(2)    0.018(2)    0.012(2)    0.003(2)   
 C(32)  0.037(2)    0.026(2)    0.029(2)    0.011(2)    0.006(2)    0.001(2)   
 C(33)  0.043(2)    0.041(2)    0.039(2)    0.019(2)    0.006(2)    0.010(2)   
 C(34)  0.041(2)    0.031(2)    0.042(2)    0.007(2)    0.010(2)    0.008(2)   
 C(35)  0.070(3)    0.033(2)    0.044(3)    0.021(2)    0.015(2)    0.004(2)   
 C(36)  0.028(2)    0.029(2)    0.023(2)    0.011(1)    0.005(1)    0.001(1)   
 C(37)  0.031(2)    0.026(2)    0.034(2)    0.015(2)    0.007(2)    0.007(2)   
 C(38)  0.045(2)    0.049(3)    0.062(3)    0.030(2)    0.020(2)    0.013(2)   
 C(39)  0.038(2)    0.048(3)    0.089(4)    0.020(2)    -0.001(2)   -0.019(3)  
 C(40)  0.107(4)    0.091(4)    0.049(3)    0.072(4)    0.023(3)    0.031(3)   
 C(41)  0.025(2)    0.023(2)    0.026(2)    0.0080(13)  0.006(1)    0.002(1)   
 C(42)  0.025(2)    0.024(2)    0.030(2)    0.011(1)    0.006(1)    0.000(1)   
 C(43)  0.027(2)    0.028(2)    0.024(2)    0.012(1)    0.002(1)    0.002(1)   
 C(44)  0.032(2)    0.027(2)    0.024(2)    0.014(1)    0.008(1)    0.002(1)   
 C(45)  0.024(2)    0.024(2)    0.029(2)    0.0094(13)  0.009(1)    0.006(1)   
 C(46)  0.034(2)    0.033(2)    0.031(2)    0.016(2)    0.012(2)    0.006(2)   
 C(47)  0.026(2)    0.039(2)    0.039(2)    0.015(2)    0.008(2)    0.007(2)   
 C(48)  0.025(2)    0.043(2)    0.035(2)    0.011(2)    0.002(2)    0.006(2)   
 C(49)  0.028(2)    0.035(2)    0.030(2)    0.012(2)    0.005(2)    0.002(2)   
 C(50)  0.024(2)    0.025(2)    0.026(2)    0.0083(13)  0.0060(13)  0.005(1)   
 C(51)  0.137(6)    0.086(5)    0.066(4)    -0.006(5)   -0.029(4)   0.039(4)   
 C(52)  0.127(6)    0.098(5)    0.078(5)    -0.000(5)   -0.020(5)   0.031(4)   
 C(53)  0.153(7)    0.108(6)    0.114(7)    -0.001(5)   -0.023(5)   0.063(5)   

#==============================================================================

_computing_data_collection            'CrystalClear'
_computing_cell_refinement            'CrystalClear'
_computing_data_reduction             'CrystalStructure'
_computing_structure_solution         'SHELXS97'
_computing_structure_refinement       'CRYSTALS'
_computing_publication_material       'CrystalStructure 3.6.0'
_computing_molecular_graphics          ?

#==============================================================================

# MOLECULAR GEOMETRY

_geom_special_details
;
    ENTER SPECIAL DETAILS OF THE MOLECULAR GEOMETRY
;

loop_
_geom_bond_atom_site_label_1
_geom_bond_atom_site_label_2
_geom_bond_distance
_geom_bond_publ_flag
_geom_bond_site_symmetry_1
_geom_bond_site_symmetry_2
O(1)      O(2)      1.506(4)    ?     . .
O(1)      C(1)      1.453(3)    ?     . .
O(2)      C(2)      1.484(3)    ?     . .
O(3)      C(11)     1.222(5)    ?     . .
O(4)      C(11)     1.320(4)    ?     . .
O(4)      C(12)     1.478(5)    ?     . .
O(5)      C(18)     1.371(3)    ?     . .
O(6)      O(7)      1.498(4)    ?     . .
O(6)      C(26)     1.456(3)    ?     . .
O(7)      C(27)     1.480(4)    ?     . .
O(8)      C(36)     1.222(4)    ?     . .
O(9)      C(36)     1.326(5)    ?     . .
O(9)      C(37)     1.478(5)    ?     . .
O(10)     C(43)     1.370(4)    ?     . .
N(1)      C(1)      1.455(5)    ?     . .
N(1)      C(4)      1.470(4)    ?     . .
N(1)      C(11)     1.364(5)    ?     . .
N(2)      C(26)     1.450(4)    ?     . .
N(2)      C(29)     1.473(5)    ?     . .
N(2)      C(36)     1.357(5)    ?     . .
C(1)      C(2)      1.567(5)    ?     . .
C(1)      C(16)     1.525(4)    ?     . .
C(2)      C(3)      1.551(4)    ?     . .
C(2)      C(7)      1.556(6)    ?     . .
C(3)      C(4)      1.541(6)    ?     . .
C(3)      C(5)      1.532(5)    ?     . .
C(3)      C(6)      1.528(4)    ?     . .
C(7)      C(8)      1.545(5)    ?     . .
C(7)      C(9)      1.536(6)    ?     . .
C(7)      C(10)     1.541(4)    ?     . .
C(12)     C(13)     1.509(6)    ?     . .
C(12)     C(14)     1.511(6)    ?     . .
C(12)     C(15)     1.516(5)    ?     . .
C(16)     C(17)     1.377(4)    ?     . .
C(16)     C(25)     1.426(4)    ?     . .
C(17)     C(18)     1.399(4)    ?     . .
C(18)     C(19)     1.366(4)    ?     . .
C(19)     C(20)     1.410(4)    ?     . .
C(20)     C(21)     1.410(5)    ?     . .
C(20)     C(25)     1.428(4)    ?     . .
C(21)     C(22)     1.367(4)    ?     . .
C(22)     C(23)     1.397(5)    ?     . .
C(23)     C(24)     1.366(5)    ?     . .
C(24)     C(25)     1.424(4)    ?     . .
C(26)     C(27)     1.577(6)    ?     . .
C(26)     C(41)     1.522(5)    ?     . .
C(27)     C(28)     1.556(5)    ?     . .
C(27)     C(32)     1.551(5)    ?     . .
C(28)     C(29)     1.532(6)    ?     . .
C(28)     C(30)     1.540(5)    ?     . .
C(28)     C(31)     1.536(5)    ?     . .
C(32)     C(33)     1.531(5)    ?     . .
C(32)     C(34)     1.542(5)    ?     . .
C(32)     C(35)     1.537(6)    ?     . .
C(37)     C(38)     1.496(6)    ?     . .
C(37)     C(39)     1.516(5)    ?     . .
C(37)     C(40)     1.492(6)    ?     . .
C(41)     C(42)     1.367(4)    ?     . .
C(41)     C(50)     1.434(5)    ?     . .
C(42)     C(43)     1.407(5)    ?     . .
C(43)     C(44)     1.360(5)    ?     . .
C(44)     C(45)     1.409(4)    ?     . .
C(45)     C(46)     1.426(5)    ?     . .
C(45)     C(50)     1.433(5)    ?     . .
C(46)     C(47)     1.363(5)    ?     . .
C(47)     C(48)     1.397(5)    ?     . .
C(48)     C(49)     1.372(6)    ?     . .
C(49)     C(50)     1.412(4)    ?     . .
C(51)     C(52)     1.53(1)     ?     . .
C(52)     C(53)     1.53(1)     ?     . .
O(5)      H(62)     1.0515      ?     . .
O(10)     H(63)     1.0793      ?     . .
C(4)      H(1)      0.9499      ?     . .
C(4)      H(2)      0.9500      ?     . .
C(5)      H(3)      0.9500      ?     . .
C(5)      H(4)      0.9500      ?     . .
C(5)      H(5)      0.9501      ?     . .
C(6)      H(6)      0.9500      ?     . .
C(6)      H(7)      0.9500      ?     . .
C(6)      H(8)      0.9500      ?     . .
C(8)      H(9)      0.9500      ?     . .
C(8)      H(10)     0.9500      ?     . .
C(8)      H(11)     0.9500      ?     . .
C(9)      H(12)     0.9500      ?     . .
C(9)      H(13)     0.9499      ?     . .
C(9)      H(14)     0.9499      ?     . .
C(10)     H(15)     0.9500      ?     . .
C(10)     H(16)     0.9501      ?     . .
C(10)     H(17)     0.9500      ?     . .
C(13)     H(18)     0.9500      ?     . .
C(13)     H(19)     0.9500      ?     . .
C(13)     H(20)     0.9500      ?     . .
C(14)     H(21)     0.9500      ?     . .
C(14)     H(22)     0.9501      ?     . .
C(14)     H(23)     0.9500      ?     . .
C(15)     H(24)     0.9500      ?     . .
C(15)     H(25)     0.9500      ?     . .
C(15)     H(26)     0.9500      ?     . .
C(17)     H(27)     0.9500      ?     . .
C(19)     H(28)     0.9500      ?     . .
C(21)     H(29)     0.9500      ?     . .
C(22)     H(30)     0.9500      ?     . .
C(23)     H(31)     0.9500      ?     . .
C(24)     H(32)     0.9501      ?     . .
C(29)     H(33)     0.9500      ?     . .
C(29)     H(34)     0.9501      ?     . .
C(30)     H(35)     0.9501      ?     . .
C(30)     H(36)     0.9500      ?     . .
C(30)     H(37)     0.9500      ?     . .
C(31)     H(38)     0.9500      ?     . .
C(31)     H(39)     0.9500      ?     . .
C(31)     H(40)     0.9500      ?     . .
C(33)     H(41)     0.9500      ?     . .
C(33)     H(42)     0.9499      ?     . .
C(33)     H(43)     0.9500      ?     . .
C(34)     H(44)     0.9500      ?     . .
C(34)     H(45)     0.9500      ?     . .
C(34)     H(46)     0.9500      ?     . .
C(35)     H(47)     0.9500      ?     . .
C(35)     H(48)     0.9500      ?     . .
C(35)     H(49)     0.9500      ?     . .
C(38)     H(50)     0.9499      ?     . .
C(38)     H(51)     0.9500      ?     . .
C(38)     H(52)     0.9500      ?     . .
C(39)     H(64)     0.9500      ?     . .
C(39)     H(65)     0.9500      ?     . .
C(39)     H(66)     0.9501      ?     . .
C(40)     H(53)     0.9500      ?     . .
C(40)     H(54)     0.9500      ?     . .
C(40)     H(55)     0.9500      ?     . .
C(42)     H(56)     0.9500      ?     . .
C(44)     H(57)     0.9499      ?     . .
C(46)     H(58)     0.9500      ?     . .
C(47)     H(59)     0.9500      ?     . .
C(48)     H(60)     0.9500      ?     . .
C(49)     H(61)     0.9500      ?     . .
C(51)     H(67)     0.9500      ?     . .
C(51)     H(68)     0.9500      ?     . .
C(52)     H(70)     0.9500      ?     . .
C(52)     H(71)     0.9500      ?     . .
C(53)     H(69)     0.9500      ?     . .
C(53)     H(72)     0.9501      ?     . .
C(53)     H(73)     0.9499      ?     . .

loop_
_geom_angle_atom_site_label_1
_geom_angle_atom_site_label_2
_geom_angle_atom_site_label_3
_geom_angle
_geom_angle_publ_flag
_geom_angle_site_symmetry_1
_geom_angle_site_symmetry_2
_geom_angle_site_symmetry_3
C(1)      O(1)      O(2)      90.4(2)     ?     . . .
O(1)      O(2)      C(2)      90.5(2)     ?     . . .
O(1)      C(1)      N(1)      110.6(3)    ?     . . .
O(1)      C(1)      C(2)      89.2(2)     ?     . . .
O(1)      C(1)      C(16)     115.3(2)    ?     . . .
O(2)      C(2)      C(1)      87.0(2)     ?     . . .
O(2)      C(2)      C(3)      105.9(2)    ?     . . .
O(2)      C(2)      C(7)      107.8(2)    ?     . . .
O(3)      C(11)     O(4)      126.1(4)    ?     . . .
O(3)      C(11)     N(1)      121.8(3)    ?     . . .
O(4)      C(11)     N(1)      112.1(3)    ?     . . .
C(12)     O(4)      C(11)     120.9(3)    ?     . . .
O(4)      C(12)     C(14)     109.6(3)    ?     . . .
O(4)      C(12)     C(15)     109.8(3)    ?     . . .
O(4)      C(12)     C(13)     102.1(4)    ?     . . .
O(5)      C(18)     C(17)     120.8(3)    ?     . . .
O(5)      C(18)     C(19)     119.7(3)    ?     . . .
C(26)     O(6)      O(7)      90.1(2)     ?     . . .
O(6)      O(7)      C(27)     91.3(2)     ?     . . .
O(6)      C(26)     N(2)      110.9(3)    ?     . . .
O(6)      C(26)     C(27)     89.1(2)     ?     . . .
O(6)      C(26)     C(41)     114.8(3)    ?     . . .
O(7)      C(27)     C(26)     86.2(3)     ?     . . .
O(7)      C(27)     C(28)     105.4(3)    ?     . . .
O(7)      C(27)     C(32)     107.5(2)    ?     . . .
O(8)      C(36)     O(9)      124.8(4)    ?     . . .
O(8)      C(36)     N(2)      121.8(3)    ?     . . .
O(9)      C(36)     N(2)      113.4(3)    ?     . . .
C(37)     O(9)      C(36)     121.3(2)    ?     . . .
O(9)      C(37)     C(39)     107.2(3)    ?     . . .
O(9)      C(37)     C(40)     111.5(3)    ?     . . .
O(9)      C(37)     C(38)     103.3(3)    ?     . . .
O(10)     C(43)     C(42)     115.8(3)    ?     . . .
O(10)     C(43)     C(44)     124.7(3)    ?     . . .
N(1)      C(1)      C(2)      103.4(3)    ?     . . .
C(4)      N(1)      C(1)      111.5(3)    ?     . . .
C(11)     N(1)      C(1)      124.0(3)    ?     . . .
N(1)      C(1)      C(16)     111.6(3)    ?     . . .
N(1)      C(4)      C(3)      104.7(3)    ?     . . .
C(11)     N(1)      C(4)      118.4(3)    ?     . . .
N(2)      C(26)     C(27)     103.6(3)    ?     . . .
C(29)     N(2)      C(26)     112.0(3)    ?     . . .
C(36)     N(2)      C(26)     125.1(3)    ?     . . .
N(2)      C(26)     C(41)     111.2(2)    ?     . . .
N(2)      C(29)     C(28)     105.3(3)    ?     . . .
C(36)     N(2)      C(29)     117.9(3)    ?     . . .
C(1)      C(2)      C(3)      107.7(3)    ?     . . .
C(1)      C(2)      C(7)      119.9(3)    ?     . . .
C(16)     C(1)      C(2)      124.4(3)    ?     . . .
C(1)      C(16)     C(25)     126.7(2)    ?     . . .
C(1)      C(16)     C(17)     114.1(3)    ?     . . .
C(2)      C(3)      C(4)      101.2(3)    ?     . . .
C(7)      C(2)      C(3)      121.9(3)    ?     . . .
C(2)      C(3)      C(5)      114.1(3)    ?     . . .
C(2)      C(3)      C(6)      115.0(3)    ?     . . .
C(2)      C(7)      C(8)      109.4(3)    ?     . . .
C(2)      C(7)      C(9)      110.1(3)    ?     . . .
C(2)      C(7)      C(10)     115.2(3)    ?     . . .
C(5)      C(3)      C(4)      107.0(3)    ?     . . .
C(6)      C(3)      C(4)      109.2(3)    ?     . . .
C(6)      C(3)      C(5)      109.6(3)    ?     . . .
C(9)      C(7)      C(8)      107.1(3)    ?     . . .
C(10)     C(7)      C(8)      106.8(3)    ?     . . .
C(10)     C(7)      C(9)      107.9(3)    ?     . . .
C(14)     C(12)     C(13)     109.8(3)    ?     . . .
C(15)     C(12)     C(13)     112.0(3)    ?     . . .
C(15)     C(12)     C(14)     113.0(4)    ?     . . .
C(25)     C(16)     C(17)     119.3(3)    ?     . . .
C(16)     C(17)     C(18)     122.4(3)    ?     . . .
C(16)     C(25)     C(24)     125.1(3)    ?     . . .
C(16)     C(25)     C(20)     117.9(2)    ?     . . .
C(17)     C(18)     C(19)     119.5(2)    ?     . . .
C(18)     C(19)     C(20)     120.4(3)    ?     . . .
C(19)     C(20)     C(25)     120.4(3)    ?     . . .
C(19)     C(20)     C(21)     119.8(3)    ?     . . .
C(25)     C(20)     C(21)     119.7(2)    ?     . . .
C(20)     C(21)     C(22)     121.3(3)    ?     . . .
C(20)     C(25)     C(24)     117.0(3)    ?     . . .
C(21)     C(22)     C(23)     119.6(3)    ?     . . .
C(22)     C(23)     C(24)     120.9(3)    ?     . . .
C(23)     C(24)     C(25)     121.6(3)    ?     . . .
C(26)     C(27)     C(28)     107.2(3)    ?     . . .
C(26)     C(27)     C(32)     120.4(3)    ?     . . .
C(41)     C(26)     C(27)     125.0(3)    ?     . . .
C(26)     C(41)     C(50)     125.5(3)    ?     . . .
C(26)     C(41)     C(42)     114.4(3)    ?     . . .
C(27)     C(28)     C(29)     102.2(3)    ?     . . .
C(32)     C(27)     C(28)     122.7(3)    ?     . . .
C(27)     C(28)     C(30)     113.5(2)    ?     . . .
C(27)     C(28)     C(31)     114.4(3)    ?     . . .
C(27)     C(32)     C(34)     109.6(3)    ?     . . .
C(27)     C(32)     C(35)     109.3(3)    ?     . . .
C(27)     C(32)     C(33)     115.1(2)    ?     . . .
C(30)     C(28)     C(29)     107.1(3)    ?     . . .
C(31)     C(28)     C(29)     110.3(3)    ?     . . .
C(31)     C(28)     C(30)     109.0(3)    ?     . . .
C(34)     C(32)     C(33)     106.9(3)    ?     . . .
C(35)     C(32)     C(33)     108.6(4)    ?     . . .
C(35)     C(32)     C(34)     107.0(3)    ?     . . .
C(39)     C(37)     C(38)     109.6(3)    ?     . . .
C(40)     C(37)     C(38)     112.0(4)    ?     . . .
C(40)     C(37)     C(39)     112.7(3)    ?     . . .
C(50)     C(41)     C(42)     119.8(3)    ?     . . .
C(41)     C(42)     C(43)     122.4(3)    ?     . . .
C(41)     C(50)     C(49)     125.5(3)    ?     . . .
C(41)     C(50)     C(45)     116.9(3)    ?     . . .
C(42)     C(43)     C(44)     119.5(3)    ?     . . .
C(43)     C(44)     C(45)     120.3(3)    ?     . . .
C(44)     C(45)     C(50)     121.1(3)    ?     . . .
C(44)     C(45)     C(46)     119.7(3)    ?     . . .
C(50)     C(45)     C(46)     119.2(3)    ?     . . .
C(45)     C(46)     C(47)     121.2(3)    ?     . . .
C(45)     C(50)     C(49)     117.5(3)    ?     . . .
C(46)     C(47)     C(48)     119.5(4)    ?     . . .
C(47)     C(48)     C(49)     121.3(3)    ?     . . .
C(48)     C(49)     C(50)     121.3(3)    ?     . . .
C(51)     C(52)     C(53)     115.2(6)    ?     . . .
H(62)     O(5)      C(18)     108.3879    ?     . . .
H(63)     O(10)     C(43)     109.7266    ?     . . .
N(1)      C(4)      H(2)      110.7989    ?     . . .
N(1)      C(4)      H(1)      110.5324    ?     . . .
N(2)      C(29)     H(33)     110.5483    ?     . . .
N(2)      C(29)     H(34)     110.6468    ?     . . .
C(3)      C(4)      H(2)      110.8556    ?     . . .
C(3)      C(4)      H(1)      110.4310    ?     . . .
C(3)      C(5)      H(3)      109.8536    ?     . . .
C(3)      C(5)      H(5)      109.0220    ?     . . .
C(3)      C(5)      H(4)      109.2848    ?     . . .
C(3)      C(6)      H(8)      109.0594    ?     . . .
C(3)      C(6)      H(6)      109.4860    ?     . . .
C(3)      C(6)      H(7)      108.8972    ?     . . .
H(2)      C(4)      H(1)      109.4654    ?     . . .
H(5)      C(5)      H(3)      109.4758    ?     . . .
H(4)      C(5)      H(3)      109.2603    ?     . . .
H(5)      C(5)      H(4)      109.9323    ?     . . .
H(8)      C(6)      H(6)      109.4777    ?     . . .
H(7)      C(6)      H(6)      109.6576    ?     . . .
H(8)      C(6)      H(7)      110.2451    ?     . . .
C(7)      C(8)      H(9)      108.6904    ?     . . .
C(7)      C(8)      H(11)     109.0097    ?     . . .
C(7)      C(8)      H(10)     109.8601    ?     . . .
C(7)      C(9)      H(14)     108.6179    ?     . . .
C(7)      C(9)      H(12)     109.7226    ?     . . .
C(7)      C(9)      H(13)     110.1545    ?     . . .
C(7)      C(10)     H(15)     109.6564    ?     . . .
C(7)      C(10)     H(17)     108.7669    ?     . . .
C(7)      C(10)     H(16)     109.7981    ?     . . .
H(11)     C(8)      H(9)      109.4761    ?     . . .
H(10)     C(8)      H(9)      109.9678    ?     . . .
H(11)     C(8)      H(10)     109.8131    ?     . . .
H(14)     C(9)      H(12)     109.4682    ?     . . .
H(13)     C(9)      H(12)     109.3215    ?     . . .
H(14)     C(9)      H(13)     109.5403    ?     . . .
H(17)     C(10)     H(15)     109.4698    ?     . . .
H(16)     C(10)     H(15)     109.2331    ?     . . .
H(17)     C(10)     H(16)     109.9033    ?     . . .
C(12)     C(13)     H(18)     110.3457    ?     . . .
C(12)     C(13)     H(19)     109.4678    ?     . . .
C(12)     C(13)     H(20)     108.1724    ?     . . .
C(12)     C(14)     H(22)     109.3030    ?     . . .
C(12)     C(14)     H(23)     108.5642    ?     . . .
C(12)     C(14)     H(21)     110.2237    ?     . . .
C(12)     C(15)     H(24)     108.9997    ?     . . .
C(12)     C(15)     H(26)     109.7620    ?     . . .
C(12)     C(15)     H(25)     109.4441    ?     . . .
H(19)     C(13)     H(18)     109.2142    ?     . . .
H(20)     C(13)     H(18)     109.4745    ?     . . .
H(20)     C(13)     H(19)     110.1550    ?     . . .
H(22)     C(14)     H(21)     109.1863    ?     . . .
H(23)     C(14)     H(21)     109.4724    ?     . . .
H(23)     C(14)     H(22)     110.0809    ?     . . .
H(26)     C(15)     H(24)     109.4682    ?     . . .
H(25)     C(15)     H(24)     109.6296    ?     . . .
H(26)     C(15)     H(25)     109.5229    ?     . . .
C(16)     C(17)     H(27)     118.6682    ?     . . .
H(27)     C(17)     C(18)     118.9315    ?     . . .
C(18)     C(19)     H(28)     120.1863    ?     . . .
H(28)     C(19)     C(20)     119.4475    ?     . . .
C(20)     C(21)     H(29)     119.6135    ?     . . .
H(29)     C(21)     C(22)     119.0961    ?     . . .
C(21)     C(22)     H(30)     120.4416    ?     . . .
H(30)     C(22)     C(23)     119.9718    ?     . . .
C(22)     C(23)     H(31)     119.4706    ?     . . .
C(23)     C(24)     H(32)     119.2290    ?     . . .
H(31)     C(23)     C(24)     119.6661    ?     . . .
H(32)     C(24)     C(25)     119.1987    ?     . . .
C(28)     C(29)     H(33)     110.2109    ?     . . .
C(28)     C(29)     H(34)     110.6642    ?     . . .
C(28)     C(30)     H(35)     109.4277    ?     . . .
C(28)     C(30)     H(37)     108.9812    ?     . . .
C(28)     C(30)     H(36)     109.2494    ?     . . .
C(28)     C(31)     H(39)     109.4677    ?     . . .
C(28)     C(31)     H(40)     109.1353    ?     . . .
C(28)     C(31)     H(38)     109.3902    ?     . . .
H(34)     C(29)     H(33)     109.4629    ?     . . .
H(37)     C(30)     H(35)     109.4744    ?     . . .
H(36)     C(30)     H(35)     109.5233    ?     . . .
H(37)     C(30)     H(36)     110.1681    ?     . . .
H(39)     C(31)     H(38)     109.6133    ?     . . .
H(40)     C(31)     H(38)     109.4777    ?     . . .
H(40)     C(31)     H(39)     109.7415    ?     . . .
C(32)     C(33)     H(41)     109.9403    ?     . . .
C(32)     C(33)     H(43)     109.4574    ?     . . .
C(32)     C(33)     H(42)     109.2925    ?     . . .
C(32)     C(34)     H(44)     109.0697    ?     . . .
C(32)     C(34)     H(46)     110.0469    ?     . . .
C(32)     C(34)     H(45)     109.3904    ?     . . .
C(32)     C(35)     H(47)     109.7886    ?     . . .
C(32)     C(35)     H(48)     109.6283    ?     . . .
C(32)     C(35)     H(49)     109.2598    ?     . . .
H(43)     C(33)     H(41)     109.4743    ?     . . .
H(42)     C(33)     H(41)     109.1633    ?     . . .
H(43)     C(33)     H(42)     109.4987    ?     . . .
H(46)     C(34)     H(44)     109.4730    ?     . . .
H(45)     C(34)     H(44)     109.2851    ?     . . .
H(46)     C(34)     H(45)     109.5587    ?     . . .
H(48)     C(35)     H(47)     109.3383    ?     . . .
H(49)     C(35)     H(47)     109.4749    ?     . . .
H(49)     C(35)     H(48)     109.3365    ?     . . .
C(37)     C(38)     H(50)     109.1933    ?     . . .
C(37)     C(38)     H(51)     109.5859    ?     . . .
C(37)     C(38)     H(52)     108.9493    ?     . . .
C(37)     C(39)     H(64)     110.5910    ?     . . .
C(37)     C(39)     H(65)     108.6993    ?     . . .
C(37)     C(39)     H(66)     108.7743    ?     . . .
C(37)     C(40)     H(54)     110.1682    ?     . . .
C(37)     C(40)     H(55)     110.4571    ?     . . .
C(37)     C(40)     H(53)     108.4127    ?     . . .
H(51)     C(38)     H(50)     109.4645    ?     . . .
H(52)     C(38)     H(50)     109.4707    ?     . . .
H(52)     C(38)     H(51)     110.1587    ?     . . .
H(65)     C(39)     H(64)     109.1579    ?     . . .
H(66)     C(39)     H(64)     109.4743    ?     . . .
H(66)     C(39)     H(65)     110.1336    ?     . . .
H(54)     C(40)     H(53)     109.5593    ?     . . .
H(55)     C(40)     H(53)     109.4715    ?     . . .
H(55)     C(40)     H(54)     108.7591    ?     . . .
C(41)     C(42)     H(56)     118.6269    ?     . . .
H(56)     C(42)     C(43)     118.9782    ?     . . .
C(43)     C(44)     H(57)     119.9289    ?     . . .
H(57)     C(44)     C(45)     119.8119    ?     . . .
C(45)     C(46)     H(58)     119.0694    ?     . . .
H(58)     C(46)     C(47)     119.7560    ?     . . .
C(46)     C(47)     H(59)     119.6947    ?     . . .
H(59)     C(47)     C(48)     120.7895    ?     . . .
C(47)     C(48)     H(60)     119.0366    ?     . . .
C(48)     C(49)     H(61)     119.3550    ?     . . .
H(60)     C(48)     C(49)     119.6864    ?     . . .
H(61)     C(49)     C(50)     119.3020    ?     . . .
H(68)     C(51)     C(52)     107.3600    ?     . . .
C(51)     C(52)     H(71)     108.4666    ?     . . .
H(67)     C(51)     C(52)     106.5050    ?     . . .
C(51)     C(52)     H(70)     109.3244    ?     . . .
H(68)     C(51)     H(67)     109.4609    ?     . . .
C(52)     C(53)     H(69)     110.0611    ?     . . .
H(71)     C(52)     C(53)     106.6196    ?     . . .
H(70)     C(52)     C(53)     107.6607    ?     . . .
C(52)     C(53)     H(72)     111.2222    ?     . . .
C(52)     C(53)     H(73)     107.0994    ?     . . .
H(71)     C(52)     H(70)     109.4666    ?     . . .
H(72)     C(53)     H(69)     109.4742    ?     . . .
H(73)     C(53)     H(69)     109.4720    ?     . . .
H(73)     C(53)     H(72)     109.4696    ?     . . .

loop_
_geom_torsion_atom_site_label_1
_geom_torsion_atom_site_label_2
_geom_torsion_atom_site_label_3
_geom_torsion_atom_site_label_4
_geom_torsion
_geom_torsion_publ_flag
_geom_torsion_site_symmetry_1
_geom_torsion_site_symmetry_2
_geom_torsion_site_symmetry_3
_geom_torsion_site_symmetry_4
C(1)      O(1)      O(2)      C(2)      13.4(2)     ?     . . . .
O(2)      O(1)      C(1)      N(1)      91.3(3)     ?     . . . .
O(2)      O(1)      C(1)      C(2)      -12.7(2)    ?     . . . .
O(2)      O(1)      C(1)      C(16)     -140.9(3)   ?     . . . .
O(1)      O(2)      C(2)      C(1)      -12.5(2)    ?     . . . .
O(1)      O(2)      C(2)      C(3)      -120.1(3)   ?     . . . .
O(1)      O(2)      C(2)      C(7)      108.0(3)    ?     . . . .
C(12)     O(4)      C(11)     O(3)      -11.3(4)    ?     . . . .
C(12)     O(4)      C(11)     N(1)      168.1(2)    ?     . . . .
C(11)     O(4)      C(12)     C(13)     -173.1(2)   ?     . . . .
C(11)     O(4)      C(12)     C(14)     70.6(3)     ?     . . . .
C(11)     O(4)      C(12)     C(15)     -54.1(4)    ?     . . . .
C(26)     O(6)      O(7)      C(27)     14.4(2)     ?     . . . .
O(7)      O(6)      C(26)     N(2)      90.7(3)     ?     . . . .
O(7)      O(6)      C(26)     C(27)     -13.5(2)    ?     . . . .
O(7)      O(6)      C(26)     C(41)     -142.2(3)   ?     . . . .
O(6)      O(7)      C(27)     C(26)     -13.3(2)    ?     . . . .
O(6)      O(7)      C(27)     C(28)     -120.2(3)   ?     . . . .
O(6)      O(7)      C(27)     C(32)     107.4(3)    ?     . . . .
C(37)     O(9)      C(36)     O(8)      -15.5(4)    ?     . . . .
C(37)     O(9)      C(36)     N(2)      164.1(2)    ?     . . . .
C(36)     O(9)      C(37)     C(38)     -176.0(3)   ?     . . . .
C(36)     O(9)      C(37)     C(39)     -60.2(4)    ?     . . . .
C(36)     O(9)      C(37)     C(40)     63.6(4)     ?     . . . .
C(4)      N(1)      C(1)      O(1)      -79.7(3)    ?     . . . .
C(4)      N(1)      C(1)      C(2)      14.6(3)     ?     . . . .
C(4)      N(1)      C(1)      C(16)     150.5(2)    ?     . . . .
C(11)     N(1)      C(1)      O(1)      72.3(3)     ?     . . . .
C(11)     N(1)      C(1)      C(2)      166.6(2)    ?     . . . .
C(11)     N(1)      C(1)      C(16)     -57.5(3)    ?     . . . .
C(1)      N(1)      C(4)      C(3)      -31.4(3)    ?     . . . .
C(11)     N(1)      C(4)      C(3)      174.9(2)    ?     . . . .
C(1)      N(1)      C(11)     O(3)      -169.5(2)   ?     . . . .
C(1)      N(1)      C(11)     O(4)      11.1(3)     ?     . . . .
C(4)      N(1)      C(11)     O(3)      -19.3(4)    ?     . . . .
C(4)      N(1)      C(11)     O(4)      161.3(2)    ?     . . . .
C(29)     N(2)      C(26)     O(6)      -81.3(3)    ?     . . . .
C(29)     N(2)      C(26)     C(27)     13.0(3)     ?     . . . .
C(29)     N(2)      C(26)     C(41)     149.7(3)    ?     . . . .
C(36)     N(2)      C(26)     O(6)      73.0(4)     ?     . . . .
C(36)     N(2)      C(26)     C(27)     167.3(3)    ?     . . . .
C(36)     N(2)      C(26)     C(41)     -56.0(4)    ?     . . . .
C(26)     N(2)      C(29)     C(28)     -28.7(3)    ?     . . . .
C(36)     N(2)      C(29)     C(28)     174.9(2)    ?     . . . .
C(26)     N(2)      C(36)     O(8)      -169.5(3)   ?     . . . .
C(26)     N(2)      C(36)     O(9)      10.9(4)     ?     . . . .
C(29)     N(2)      C(36)     O(8)      -16.5(4)    ?     . . . .
C(29)     N(2)      C(36)     O(9)      163.8(2)    ?     . . . .
O(1)      C(1)      C(2)      O(2)      12.9(2)     ?     . . . .
O(1)      C(1)      C(2)      C(3)      118.6(3)    ?     . . . .
O(1)      C(1)      C(2)      C(7)      -95.9(3)    ?     . . . .
N(1)      C(1)      C(2)      O(2)      -98.1(2)    ?     . . . .
N(1)      C(1)      C(2)      C(3)      7.6(3)      ?     . . . .
N(1)      C(1)      C(2)      C(7)      153.1(2)    ?     . . . .
C(16)     C(1)      C(2)      O(2)      133.6(3)    ?     . . . .
C(16)     C(1)      C(2)      C(3)      -120.7(3)   ?     . . . .
C(16)     C(1)      C(2)      C(7)      24.7(4)     ?     . . . .
O(1)      C(1)      C(16)     C(17)     179.2(3)    ?     . . . .
O(1)      C(1)      C(16)     C(25)     -1.6(6)     ?     . . . .
N(1)      C(1)      C(16)     C(17)     -53.5(4)    ?     . . . .
N(1)      C(1)      C(16)     C(25)     125.7(4)    ?     . . . .
C(2)      C(1)      C(16)     C(17)     71.4(4)     ?     . . . .
C(2)      C(1)      C(16)     C(25)     -109.4(4)   ?     . . . .
O(2)      C(2)      C(3)      C(4)      66.8(3)     ?     . . . .
O(2)      C(2)      C(3)      C(5)      -47.7(4)    ?     . . . .
O(2)      C(2)      C(3)      C(6)      -175.7(3)   ?     . . . .
C(1)      C(2)      C(3)      C(4)      -25.1(3)    ?     . . . .
C(1)      C(2)      C(3)      C(5)      -139.6(3)   ?     . . . .
C(1)      C(2)      C(3)      C(6)      92.4(4)     ?     . . . .
C(7)      C(2)      C(3)      C(4)      -169.7(2)   ?     . . . .
C(7)      C(2)      C(3)      C(5)      75.8(4)     ?     . . . .
C(7)      C(2)      C(3)      C(6)      -52.2(4)    ?     . . . .
O(2)      C(2)      C(7)      C(8)      -45.3(3)    ?     . . . .
O(2)      C(2)      C(7)      C(9)      72.2(3)     ?     . . . .
O(2)      C(2)      C(7)      C(10)     -165.6(3)   ?     . . . .
C(1)      C(2)      C(7)      C(8)      51.6(3)     ?     . . . .
C(1)      C(2)      C(7)      C(9)      169.1(2)    ?     . . . .
C(1)      C(2)      C(7)      C(10)     -68.7(4)    ?     . . . .
C(3)      C(2)      C(7)      C(8)      -167.9(3)   ?     . . . .
C(3)      C(2)      C(7)      C(9)      -50.4(3)    ?     . . . .
C(3)      C(2)      C(7)      C(10)     71.9(4)     ?     . . . .
C(2)      C(3)      C(4)      N(1)      33.2(3)     ?     . . . .
C(5)      C(3)      C(4)      N(1)      153.0(2)    ?     . . . .
C(6)      C(3)      C(4)      N(1)      -88.4(3)    ?     . . . .
C(1)      C(16)     C(17)     C(18)     -176.3(4)   ?     . . . .
C(25)     C(16)     C(17)     C(18)     4.4(6)      ?     . . . .
C(1)      C(16)     C(25)     C(20)     177.6(4)    ?     . . . .
C(1)      C(16)     C(25)     C(24)     -5.4(6)     ?     . . . .
C(17)     C(16)     C(25)     C(20)     -3.2(6)     ?     . . . .
C(17)     C(16)     C(25)     C(24)     173.8(4)    ?     . . . .
C(16)     C(17)     C(18)     O(5)      177.2(4)    ?     . . . .
C(16)     C(17)     C(18)     C(19)     -2.0(6)     ?     . . . .
O(5)      C(18)     C(19)     C(20)     179.3(4)    ?     . . . .
C(17)     C(18)     C(19)     C(20)     -1.5(6)     ?     . . . .
C(18)     C(19)     C(20)     C(21)     -177.0(4)   ?     . . . .
C(18)     C(19)     C(20)     C(25)     2.6(6)      ?     . . . .
C(19)     C(20)     C(21)     C(22)     177.5(4)    ?     . . . .
C(25)     C(20)     C(21)     C(22)     -2.2(6)     ?     . . . .
C(19)     C(20)     C(25)     C(16)     -0.2(5)     ?     . . . .
C(19)     C(20)     C(25)     C(24)     -177.4(4)   ?     . . . .
C(21)     C(20)     C(25)     C(16)     179.4(4)    ?     . . . .
C(21)     C(20)     C(25)     C(24)     2.2(6)      ?     . . . .
C(20)     C(21)     C(22)     C(23)     0.8(7)      ?     . . . .
C(21)     C(22)     C(23)     C(24)     0.4(7)      ?     . . . .
C(22)     C(23)     C(24)     C(25)     -0.3(7)     ?     . . . .
C(23)     C(24)     C(25)     C(16)     -178.0(4)   ?     . . . .
C(23)     C(24)     C(25)     C(20)     -1.0(6)     ?     . . . .
O(6)      C(26)     C(27)     O(7)      13.7(2)     ?     . . . .
O(6)      C(26)     C(27)     C(28)     118.7(3)    ?     . . . .
O(6)      C(26)     C(27)     C(32)     -94.4(3)    ?     . . . .
N(2)      C(26)     C(27)     O(7)      -97.5(2)    ?     . . . .
N(2)      C(26)     C(27)     C(28)     7.4(3)      ?     . . . .
N(2)      C(26)     C(27)     C(32)     154.3(3)    ?     . . . .
C(41)     C(26)     C(27)     O(7)      133.8(3)    ?     . . . .
C(41)     C(26)     C(27)     C(28)     -121.3(3)   ?     . . . .
C(41)     C(26)     C(27)     C(32)     25.6(4)     ?     . . . .
O(6)      C(26)     C(41)     C(42)     176.1(3)    ?     . . . .
O(6)      C(26)     C(41)     C(50)     -9.4(5)     ?     . . . .
N(2)      C(26)     C(41)     C(42)     -57.0(4)    ?     . . . .
N(2)      C(26)     C(41)     C(50)     117.5(4)    ?     . . . .
C(27)     C(26)     C(41)     C(42)     68.5(4)     ?     . . . .
C(27)     C(26)     C(41)     C(50)     -116.9(4)   ?     . . . .
O(7)      C(27)     C(28)     C(29)     67.3(3)     ?     . . . .
O(7)      C(27)     C(28)     C(30)     -47.6(4)    ?     . . . .
O(7)      C(27)     C(28)     C(31)     -173.5(3)   ?     . . . .
C(26)     C(27)     C(28)     C(29)     -23.5(3)    ?     . . . .
C(26)     C(27)     C(28)     C(30)     -138.4(3)   ?     . . . .
C(26)     C(27)     C(28)     C(31)     95.7(4)     ?     . . . .
C(32)     C(27)     C(28)     C(29)     -169.4(3)   ?     . . . .
C(32)     C(27)     C(28)     C(30)     75.6(4)     ?     . . . .
C(32)     C(27)     C(28)     C(31)     -50.3(4)    ?     . . . .
O(7)      C(27)     C(32)     C(33)     -171.8(3)   ?     . . . .
O(7)      C(27)     C(32)     C(34)     -51.3(4)    ?     . . . .
O(7)      C(27)     C(32)     C(35)     65.6(4)     ?     . . . .
C(26)     C(27)     C(32)     C(33)     -75.8(4)    ?     . . . .
C(26)     C(27)     C(32)     C(34)     44.7(3)     ?     . . . .
C(26)     C(27)     C(32)     C(35)     161.7(3)    ?     . . . .
C(28)     C(27)     C(32)     C(33)     65.9(4)     ?     . . . .
C(28)     C(27)     C(32)     C(34)     -173.6(3)   ?     . . . .
C(28)     C(27)     C(32)     C(35)     -56.6(4)    ?     . . . .
C(27)     C(28)     C(29)     N(2)      30.8(3)     ?     . . . .
C(30)     C(28)     C(29)     N(2)      150.3(2)    ?     . . . .
C(31)     C(28)     C(29)     N(2)      -91.2(3)    ?     . . . .
C(26)     C(41)     C(42)     C(43)     177.1(3)    ?     . . . .
C(50)     C(41)     C(42)     C(43)     2.2(5)      ?     . . . .
C(26)     C(41)     C(50)     C(45)     -175.1(3)   ?     . . . .
C(26)     C(41)     C(50)     C(49)     0.8(6)      ?     . . . .
C(42)     C(41)     C(50)     C(45)     -0.8(5)     ?     . . . .
C(42)     C(41)     C(50)     C(49)     175.1(3)    ?     . . . .
C(41)     C(42)     C(43)     O(10)     179.8(3)    ?     . . . .
C(41)     C(42)     C(43)     C(44)     -1.1(5)     ?     . . . .
O(10)     C(43)     C(44)     C(45)     177.7(3)    ?     . . . .
C(42)     C(43)     C(44)     C(45)     -1.3(5)     ?     . . . .
C(43)     C(44)     C(45)     C(46)     -176.2(3)   ?     . . . .
C(43)     C(44)     C(45)     C(50)     2.6(5)      ?     . . . .
C(44)     C(45)     C(46)     C(47)     177.5(3)    ?     . . . .
C(50)     C(45)     C(46)     C(47)     -1.3(5)     ?     . . . .
C(44)     C(45)     C(50)     C(41)     -1.5(5)     ?     . . . .
C(44)     C(45)     C(50)     C(49)     -177.8(3)   ?     . . . .
C(46)     C(45)     C(50)     C(41)     177.3(3)    ?     . . . .
C(46)     C(45)     C(50)     C(49)     1.0(5)      ?     . . . .
C(45)     C(46)     C(47)     C(48)     0.9(6)      ?     . . . .
C(46)     C(47)     C(48)     C(49)     -0.3(5)     ?     . . . .
C(47)     C(48)     C(49)     C(50)     0.0(5)      ?     . . . .
C(48)     C(49)     C(50)     C(41)     -176.3(3)   ?     . . . .
C(48)     C(49)     C(50)     C(45)     -0.4(5)     ?     . . . .

#==============================================================================

# Additional structures and associated data_? identifiers
# should be added at this point if there is more than one 
# structure analysis in the CIF.

#==============================================================================

#     End of CIF

#==============================================================================
